# Supplementary material
Source: publisher figshare collection journal article supplement (https://frontiersin.figshare.com/ndownloader/files/26190413)
Supplement: Supplementary file [file 26190413]

# The algorithm for SARS-CoV-2 polymerase chain reaction (PCR) testing

## Clinical indication

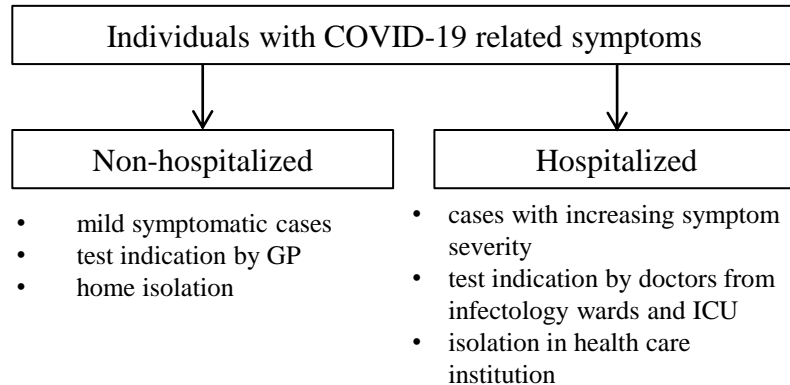

Anamnestic documentation for COVID-19 exposure

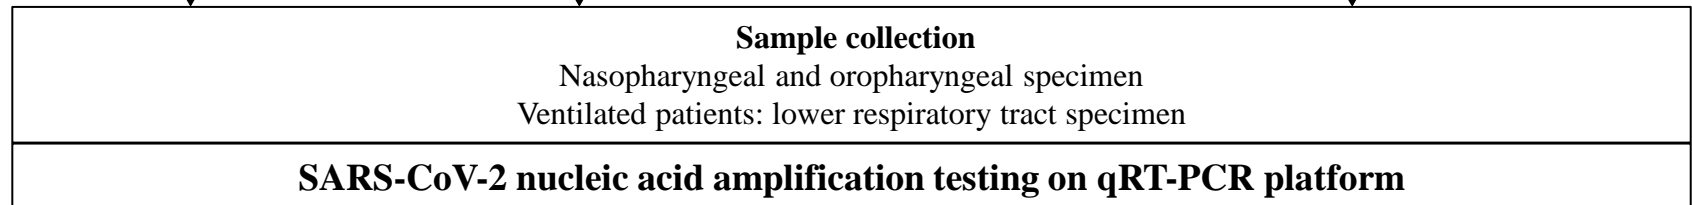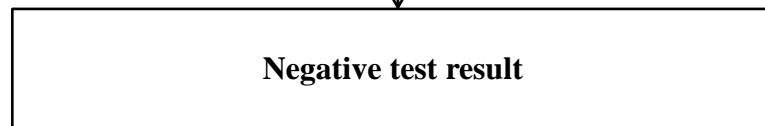

- Repeat testing after 48 hours
- Check for the presence of other potential pathogens

## Epidemiological indication

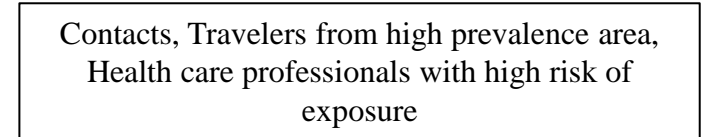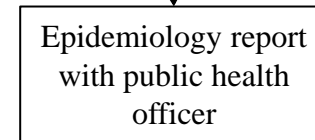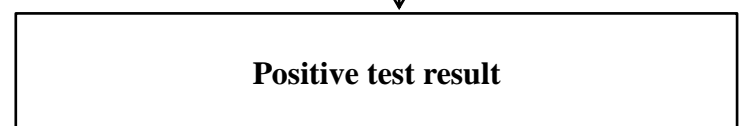

- Confirmational PCR test
- Quarantine
- Follow-up of symptoms
